# Supplementary material
Source: MDPI journal article supplement (https://www.mdpi.com/2073-4441/16/3/491)
Supplement: s1 [file s1]

## **Supporting information S1: Physico-chemical characterisation of Volga in summer low water period 2021**

Based on hydro-chemical data the shortened version of Kurlov's formula (Kurlov & Sobkevich 1921 [33]) was used to describe and compare the ionic composition of the water in the Volga headwaters in summer low water period 2021 (Table S1).

**Table S1.** Concentration (mg/l) of the main ions in the headwaters of the Volga in the summer low-flow period 2021. All nitrogen-compounds were recalculated to the ionic form, i.e. nitrate nitrogen (N-NO<sub>3</sub>) was recalculated into the nitrate ion (NO<sub>3</sub><sup>-</sup>), nitrite nitrogen (N-NO<sub>2</sub>) was recalculated into the nitrite ion (NO<sub>2</sub><sup>-</sup>) and ammonium nitrogen (N-NH<sub>4</sub>) was recalculated into the ammonium ion (NH<sub>4</sub><sup>+</sup>).

|           | anions                        |                               |                 |                               |                              | kations          |                  |                 |                |                              |
|-----------|-------------------------------|-------------------------------|-----------------|-------------------------------|------------------------------|------------------|------------------|-----------------|----------------|------------------------------|
|           | HCO <sub>3</sub> <sup>-</sup> | SO <sub>4</sub> <sup>2-</sup> | Cl <sup>-</sup> | NO <sub>3</sub> <sup>2-</sup> | NO <sub>2</sub> <sup>-</sup> | Ca <sup>2+</sup> | Mg <sup>2+</sup> | Na <sup>+</sup> | K <sup>+</sup> | NH <sub>4</sub> <sup>+</sup> |
| Kokovkino | 78.3                          | 2.12                          | 0.55            | 0.111                         | 0.003                        | 19.8             | 3.18             | 1.60            | 0.79           | 0.009                        |
| Rzhev     | 112.3                         | 5.57                          | 3.57            | 0.54                          | 0.007                        | 34.9             | 6.26             | 3.71            | 0.88           | 0.069                        |
| Tver      | 158.4                         | 5.48                          | 4.05            | 0.013                         | 0.003                        | 39.6             | 9.95             | 4.43            | 1.38           | 0.161                        |
| Konakovo  | 165.1                         | 6.29                          | 6.13            | 0.30                          | 0.023                        | 34.9             | 9.96             | 5.42            | 1.73           | 0.054                        |
| Kimry     | 160.3                         | 9.74                          | 10.5            | 1.58                          | 0.161                        | 35.4             | 6.99             | 6.77            | 1.83           | 0.12                         |
| Kalyazin  | 153.0                         | 9.70                          | 7.60            | 0.084                         | 0.063                        | 34.3             | 8.66             | 5.15            | 1.56           | 0.01                         |

The Kurlov formula is a method of visual representation of the chemical composition of natural water. The content of anions (in %-eq) is summarized above the line in descending order. and cations below the line. The formulae are used to analyse the correctness of chemical analyses. by

- the law of electroneutrality:  $\sum \text{anions} = \sum \text{cations}$ . mg-eq/l
- and
- the calculation of conductivity (based on the additivity of the electrical conductivity of electrolyte mixtures) and comparison with the measured values.
